# Supplementary material
Source: publisher figshare collection journal article supplement (https://frontiersin.figshare.com/ndownloader/files/24617417)
Supplement: Supplementary file [file 24617417]

## Supplementary Material

### Rat paraventricular neurons encode predictive and incentive information of reward cues

Unur Munkhzaya, Choijiljav Chinzorig, Jumpei Matsumoto, Hiroshi Nishimaru, Yusaku Takamura, Taketoshi Ono, and Hisao Nishijo

\* Correspondence: Dr. Hisao Nishijo, nishijo@med.u-toyama.ac.jp

#### Supplementary figures

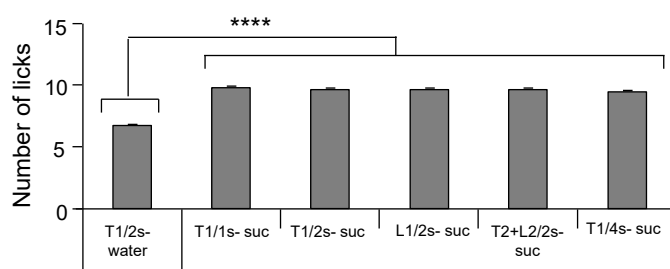

**Supplementary Figure 1. Comparison of numbers of licks per trial in the reward trials (mean number of licks  $\pm$  SEM).** The data of lick frequency per trial were analyzed when 43 CS<sup>+</sup>-selective neurons were recorded. The mean numbers of licks per trial during 2 s after the CSs were significantly lower in the water trials (Tone1 associated with water) than the sucrose trials (CSs associated with sucrose). T1/2s-water, water following 2-s Tone1; T1/1s-suc, sucrose following 1-s Tone1; T1/2s-suc, sucrose following 2-s Tone1; L1/2s-suc, sucrose following 2-s Light1; T2+L2/2s-suc, sucrose following 2-s Tone2+Light2; T1/4s-suc, sucrose following 4-s Tone1. \*\*\*\*,  $p < 0.0001$  (Bonferroni test).

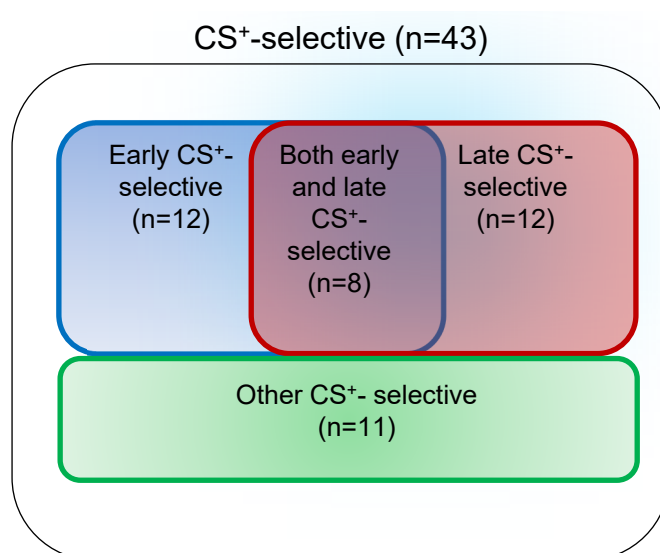

**Supplementary Figure 2. A Venn diagram showing response patterns of 43 CS<sup>+</sup>-selective neurons in the PVT.**

**Supplementary tables****Supplementary Table 1.** Summary of post-hoc statistical comparisons (Bonferroni test) in Fig. 3.

| <b>Stimulus pairs</b>         | <b>p-values</b> |
|-------------------------------|-----------------|
| Tone1 vs. Light1              | 0.999999        |
| Tone1 vs. Tone2+Light2        | 0.996620        |
| Tone1 vs. Tone2               | 2.07E-08        |
| Tone1 vs. Light2              | 2.07E-08        |
| Tone1 vs. Tone1+Light1        | 2.07E-08        |
| Light1 vs. Tone2+Light2       | 0.999314        |
| Light1 vs. Tone2              | 2.07E-08        |
| Light1 vs. Light2             | 2.07E-08        |
| Light1 vs. Tone1+Light1       | 2.07E-08        |
| Tone2+Light2 vs. Tone2        | 2.07E-08        |
| Tone2+Light2 vs. Light2       | 2.07E-08        |
| Tone2+Light2 vs. Tone1+Light1 | 2.07E-08        |
| Tone2 vs. Light2              | 1.000000        |
| Tone2 vs. Tone1+Light1        | 0.999997        |
| Light2 vs. Tone1+Light1       | 0.999985        |

**Supplementary Table 2.** Summary of post-hoc statistical comparisons (Bonferroni test) in Fig. 4J.

| <b>Stimulus pairs</b>     | <b>p-value</b> |
|---------------------------|----------------|
| Tone1 vs. Light1          | 1.000000       |
| Tone1 vs. T2+L2           | 0.998993       |
| Tone1 vs. Tone2           | 0.014854       |
| Tone1 vs. Light2          | 0.038966       |
| Tone1 vs. T1+L1           | 0.038966       |
| Tone1 vs. T1/2s-water     | 0.503158       |
| Tone1 vs. T1/1s-suc       | 0.999985       |
| Tone1 vs. T1/4s-suc       | 0.997414       |
| Light1 vs. T2+L2          | 0.997414       |
| Light1 vs. Tone2          | 0.019028       |
| Light1 vs. Light2         | 0.048997       |
| Light1 vs. T1+L1          | 0.048997       |
| Light1 vs. Tone1/2s-water | 0.564034       |
| Light1 vs. T1/1s-suc      | 0.999916       |
| Light1 vs. T1/4s-suc      | 0.994228       |
| T2+L2 vs. Tone2           | 0.002389       |
| T2+L2 vs. Light2          | 0.006911       |
| T2+L2 vs. T1+L1           | 0.006911       |
| T2+L2 vs. T1/2s-water     | 0.170265       |
| T2+L2 vs. T1/1s-suc       | 0.999998       |
| T2+L2 vs. T1/4s-suc       | 1.000000       |
| Tone2 vs. Light2          | 0.999985       |
| Tone2 vs. T1+L1           | 0.999985       |
| Tone2 vs. T1/2s-water     | 0.742537       |
| Tone2 vs. T1/1s-suc       | 0.005320       |
| Tone2 vs. T1/4s-suc       | 0.001820       |
| Light2 vs. T1+L1          | 1.000000       |
| Light2 vs. T1/2s-water    | 0.917909       |
| Light2 vs. T1/1s-suc      | 0.014854       |
| Light2 vs. T1/4s-suc      | 0.005320       |
| T1+L1 vs. T1/2s-water     | 0.917909       |
| T1+L1 vs. T1/1s-suc       | 0.014854       |
| T1+L1 vs. T1/4s-suc       | 0.005320       |
| T1/2s-water vs. T1/1s-suc | 0.286714       |
| T1/2s-water vs. T1/4s-suc | 0.140770       |
| T1/1s-suc vs. T1/4s-suc   | 0.999985       |

**Supplementary Table 3.** Summary of post-hoc statistical comparisons (Bonferroni test) in Fig. 5A.

| <b>Stimulus pairs</b>     | <b>p-value</b> |
|---------------------------|----------------|
| Tone1 vs. Light1          | 0.999890       |
| Tone1 vs. T2+L2           | 0.989803       |
| Tone1 vs. Tone2           | 8.97E-08       |
| Tone1 vs. Light2          | 8.97E-08       |
| Tone1 vs. T1+L1           | 8.97E-08       |
| Tone1 vs. T1/2s-water     | 3.58E-04       |
| Tone1 vs. T1/1s-suc       | 5.18E-02       |
| Tone1 vs. T1/4s-suc       | 0.316910       |
| Light1 vs. T2+L2          | 0.999960       |
| Light1 vs. Tone2          | 8.97E-08       |
| Light1 vs. Light2         | 8.97E-08       |
| Light1 vs. T1+L1          | 8.97E-08       |
| Light1 vs. Tone1/2s-water | 3.10E-03       |
| Light1 vs. T1/1s-suc      | 1.94E-01       |
| Light1 vs. T1/4s-suc      | 0.659221       |
| T2+L2 vs. Tone2           | 8.97E-08       |
| T2+L2 vs. Light2          | 8.97E-08       |
| T2+L2 vs. T1+L1           | 9.01E-08       |
| T2+L2 vs. T1/2s-water     | 1.61E-02       |
| T2+L2 vs. T1/1s-suc       | 0.447819       |
| T2+L2 vs. T1/4s-suc       | 0.902354       |
| Tone2 vs. Light2          | 1.000000       |
| Tone2 vs. T1+L1           | 0.999904       |
| Tone2 vs. T1/2s-water     | 4.10E-03       |
| Tone2 vs. T1/1s-suc       | 9.47E-06       |
| Tone2 vs. T1/4s-suc       | 2.20E-07       |
| Light2 vs. T1+L1          | 0.999989       |
| Light2 vs. T1/2s-water    | 6.59E-03       |
| Light2 vs. T1/1s-suc      | 1.81E-05       |
| Light2 vs. T1/4s-suc      | 3.67E-07       |
| T1+L1 vs. T1/2s-water     | 2.45E-02       |
| T1+L1 vs. T1/1s-suc       | 1.17E-04       |
| T1+L1 vs. T1/4s-suc       | 2.50E-06       |
| T1/2s-water vs. T1/1s-suc | 0.926377       |
| T1/2s-water vs. T1/4s-suc | 0.497070       |
| T1/1s-suc vs. T1/4s-suc   | 0.998072       |

**Supplementary Table 4.** Summary of post-hoc statistical comparisons (Bonferroni test) in Fig. 6J.

| <b>Stimulus pairs</b>     | <b>p-value</b> |
|---------------------------|----------------|
| Tone1 vs. Light1          | 0.999376       |
| Tone1 vs. T2+L2           | 0.961938       |
| Tone1 vs. Tone2           | 0.000013       |
| Tone1 vs. Light2          | 0.002525       |
| Tone1 vs. T1+L1           | 0.000144       |
| Tone1 vs. T1/2s-water     | 0.034687       |
| Tone1 vs. T1/1s-suc       | 1.000000       |
| Tone1 vs. T1/4s-suc       | 0.097706       |
| Light1 vs. T2+L2          | 0.999800       |
| Light1 vs. Tone2          | 0.000002       |
| Light1 vs. Light2         | 0.000414       |
| Light1 vs. T1+L1          | 0.000022       |
| Light1 vs. Tone1/2s-water | 0.006821       |
| Light1 vs. T1/1s-suc      | 0.998374       |
| Light1 vs. T1/4s-suc      | 0.321587       |
| T2+L2 vs. Tone2           | 0.000001       |
| T2+L2 vs. Light2          | 0.000084       |
| T2+L2 vs. T1+L1           | 0.000005       |
| T2+L2 vs. T1/2s-water     | 0.001518       |
| T2+L2 vs. T1/1s-suc       | 0.942301       |
| T2+L2 vs. T1/4s-suc       | 0.646258       |
| Tone2 vs. Light2          | 0.701788       |
| Tone2 vs. T1+L1           | 0.996313       |
| Tone2 vs. T1/2s-water     | 0.169877       |
| Tone2 vs. T1/1s-suc       | 0.000017       |
| Tone2 vs. T1/4s-suc       | 0.000000       |
| Light2 vs. T1+L1          | 0.986154       |
| Light2 vs. T1/2s-water    | 0.986154       |
| Light2 vs. T1/1s-suc      | 0.003249       |
| Light2 vs. T1/4s-suc      | 0.000000       |
| T1+L1 vs. T1/2s-water     | 0.589215       |
| T1+L1 vs. T1/1s-suc       | 0.000187       |
| T1+L1 vs. T1/4s-suc       | 0.000000       |
| T1/2s-water vs. T1/1s-suc | 0.043093       |
| T1/2s-water vs. T1/4s-suc | 0.000006       |
| T1/1s-suc vs. T1/4s-suc   | 0.080265       |

**Supplementary Table 5.** Summary of post-hoc statistical comparisons (Bonferroni test) in Fig. 5B.

| <b>Stimulus pairs</b>     | <b>p-value</b> |
|---------------------------|----------------|
| Tone1 vs. Light1          | 0.999807824    |
| Tone1 vs. T2+L2           | 1              |
| Tone1 vs. Tone2           | 1.02E-07       |
| Tone1 vs. Light2          | 9.06E-08       |
| Tone1 vs. T1+L1           | 1.36E-07       |
| Tone1 vs. T1/2s-water     | 2.08E-05       |
| Tone1 vs. T1/1s-suc       | 0.398004802    |
| Tone1 vs. T1/4s-suc       | 0.040178804    |
| Light1 vs. T2+L2          | 0.999940341    |
| Light1 vs. Tone2          | 4.55E-07       |
| Light1 vs. Light2         | 1.23E-07       |
| Light1 vs. T1+L1          | 1.32E-06       |
| Light1 vs. Tone1/2s-water | 0.000296036    |
| Light1 vs. T1/1s-suc      | 0.767990654    |
| Light1 vs. T1/4s-suc      | 0.006196083    |
| T2+L2 vs. Tone2           | 1.10E-07       |
| T2+L2 vs. Light2          | 9.12E-08       |
| T2+L2 vs. T1+L1           | 1.65E-07       |
| T2+L2 vs. T1/2s-water     | 3.10E-05       |
| T2+L2 vs. T1/1s-suc       | 0.450253075    |
| T2+L2 vs. T1/4s-suc       | 0.031485374    |
| Tone2 vs. Light2          | 0.999985356    |
| Tone2 vs. T1+L1           | 0.999999895    |
| Tone2 vs. T1/2s-water     | 0.938758012    |
| Tone2 vs. T1/1s-suc       | 0.001625976    |
| Tone2 vs. T1/4s-suc       | 8.97E-08       |
| Light2 vs. T1+L1          | 0.999620565    |
| Light2 vs. T1/2s-water    | 0.767990654    |
| Light2 vs. T1/1s-suc      | 0.000296036    |
| Light2 vs. T1/4s-suc      | 8.97E-08       |
| T1+L1 vs. T1/2s-water     | 0.978867399    |
| T1+L1 vs. T1/1s-suc       | 0.003762377    |
| T1+L1 vs. T1/4s-suc       | 8.97E-08       |
| T1/2s-water vs. T1/1s-suc | 0.120044926    |
| T1/2s-water vs. T1/4s-suc | 8.97E-08       |
| T1/1s-suc vs. T1/4s-suc   | 2.64E-06       |

**Supplementary Table 6.** Summary of post-hoc statistical comparisons (Bonferroni test) Fig. 7A.

| <b>Stimulus pairs</b>        | <b>p-values</b> |
|------------------------------|-----------------|
| T1/2s-water vs. T1/1s-suc    | 0.093779        |
| T1/2s-water vs T1/2s-suc     | 0.000239        |
| T1/2s-water vs. L1/2s-suc    | 0.000117        |
| T1/2s-water vs. T2+L2/2s-suc | 0.001158        |
| T1/2s-water vs. T1/4s-suc    | 0.000000        |
| T1/1s-suc vs. T1/2s-suc      | 0.536430        |
| T1/1s-suc vs. L1/2s-suc      | 0.435188        |
| T1/1s-suc vs. T2+L2/2s-suc   | 0.772107        |
| T1/1s-suc vs. T1/4s-suc      | 0.000009        |
| T1/2s-suc vs. L1/2s-suc      | 0.999988        |
| T1/2s-suc vs. T2+L2/2s-suc   | 0.999106        |
| T1/2s-suc vs. T1/4s-suc      | 0.012724        |
| L1/2s-suc vs. T2+L2/2s-suc   | 0.995250        |
| L1/2s-suc vs. T1/4s-suc      | 0.021051        |
| T2+L2/2s-suc vs. T1/4s-suc   | 0.003410        |



**Supplementary Table 7.** Summary of simple regression analyses in individual neurons (F- and p-values) in Fig. 7D.

| Neuron no. | Early CS <sup>+</sup> -selective |         | Late CS <sup>+</sup> -selective |         |
|------------|----------------------------------|---------|---------------------------------|---------|
|            | F-value                          | p-value | F-value                         | p-value |
| 1          | F(1,5)=11.8346                   | 0.0263  | F(1,5)=52.3599                  | 0.0019  |
| 2          | F(1,5)=3.2545                    | 0.1456  | F(1,5)=42.5154                  | 0.0029  |
| 3          | F(1,5)=2.5634                    | 0.1846  | F(1,5)=11.5579                  | 0.0273  |
| 4          | F(1,5)=1.9189                    | 0.2382  | F(1,5)=10.9755                  | 0.0296  |
| 5          | F(1,5)=1.6763                    | 0.2651  | F(1,5)=9.9489                   | 0.0344  |
| 6          | F(1,5)=1.3938                    | 0.3032  | F(1,5)=9.4471                   | 0.0372  |
| 7          | F(1,5)=1.0409                    | 0.3653  | F(1,5)=8.5058                   | 0.0434  |
| 8          | F(1,5)=0.6075                    | 0.4793  | F(1,5)=8.4979                   | 0.0435  |
| 9          | F(1,5)=0.5721                    | 0.4915  | F(1,5)=7.8517                   | 0.0487  |
| 10         | F(1,5)=0.5488                    | 0.4999  | F(1,5)=4.7863                   | 0.0939  |
| 11         | F(1,5)=0.4858                    | 0.5242  | F(1,5)=3.4443                   | 0.1371  |
| 12         | F(1,5)=0.3524                    | 0.5847  | F(1,5)=2.7117                   | 0.175   |
| 13         | F(1,5)=0.3331                    | 0.5948  | F(1,5)=2.4093                   | 0.1956  |
| 14         | F(1,5)=0.1924                    | 0.6836  | F(1,5)=2.187                    | 0.2133  |
| 15         | F(1,5)=0.0829                    | 0.7877  | F(1,5)=2.0164                   | 0.2286  |
| 16         | F(1,5)=0.0474                    | 0.8382  | F(1,5)=1.8902                   | 0.2412  |
| 17         | F(1,5)=0.0412                    | 0.8491  | F(1,5)=1.8059                   | 0.2502  |
| 18         | F(1,5)=0.0325                    | 0.8656  | F(1,5)=0.4554                   | 0.5368  |
| 19         | F(1,5)=0.0097                    | 0.9262  | F(1,5)=0.3481                   | 0.5869  |
| 20         | F(1,5)=0.0055                    | 0.9444  | F(1,5)=0.0318                   | 0.8672  |
